# NEW TITLES FROM AMERICAN PSYCHIATRIC ASSOCIATION PUBLISHING

## Pocket Guide to Emergent and Serious Adverse Events in Psychopharmacology

Edited by Richard Balon, M.D., and Mary K. Morreale, M.D.

2023 • 236 pages • ISBN 978-1-61537-453-3 • Paperback  
\$61.00 • Item #37453  
2023 • 236 pages • ISBN 978-1-61537-454-0 • eBook  
\$48.95 • Item #37454

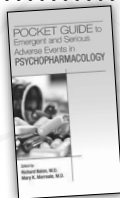

## Loneliness Science and Practice

Edited by Dilip V. Jeste, M.D., Tanya T. Nguyen, Ph.D., and Nancy J. Donovan, M.D.

2023 • 264 pages • ISBN 978-1-61537-422-9 • Paperback  
\$53.00 • Item #37422  
2023 • 264 pages • ISBN 978-1-61537-423-6 • eBook  
\$42.50 • Item #37423

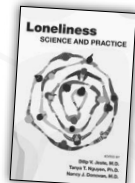

## The Role of Companion Animals in the Treatment of Mental Disorders

Edited by Nancy R. Gee, Ph.D.,  
Lisa Townsend, LCSW-C, Ph.D., and  
Robert L. Findling, M.D., M.B.A.

2023 • 314 pages • ISBN 978-1-61537-455-7 • Paperback  
\$55.00 • Item #37455  
2023 • 314 pages • ISBN 978-1-61537-456-4 • eBook  
\$44.00 • Item #37456

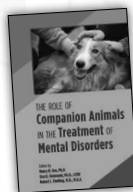

## Psychotherapy in Corrections A Supportive Approach

Peter N. Novalis, M.D., Ph.D., Virginia Singer, DNP, and  
Carol M. Novalis, M.A.

2023 • 536 pages • ISBN 978-1-61537-332-1 • Paperback  
\$89.00 • Item #37332  
2023 • 536 pages • ISBN 978-1-61537-432-8 • eBook  
\$71.00 • Item #37432

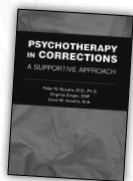

## Facing Campus Sexual Assault and Relationship Violence With Courage

A Guide for Institutions and Clinicians on  
Prevention, Support, and Healing

Edited by Helen W. Wilson, Ph.D., and  
Christina T. Khan M.D., Ph.D.

2023 • 255 pages • ISBN 978-1-61537-443-4 • Paperback  
\$54.00 • Item #37443  
2023 • 255 pages • ISBN 978-1-61537-444-1 • eBook  
\$43.00 • Item #37444

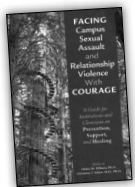

## The Object Relations Lens

A Psychodynamic Framework for the Beginning  
Therapist

Christopher W.T. Miller, M.D.

2023 • 252 pages • ISBN 978-1-61537-428-1 • Paperback  
\$52.00 • Item #37428  
2023 • 252 pages • ISBN 978-1-61537-429-8 • eBook  
\$42.00 • Item #37429

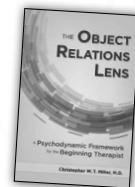

United States Postal Service

### Statement of Ownership, Management and Circulation (All Periodicals Publications Except Requester Publications)

|                                                                                                                                                                                                                                                                                                                                                                                                                                                                                                       |  |                                                      |  |                                                           |  |
|-------------------------------------------------------------------------------------------------------------------------------------------------------------------------------------------------------------------------------------------------------------------------------------------------------------------------------------------------------------------------------------------------------------------------------------------------------------------------------------------------------|--|------------------------------------------------------|--|-----------------------------------------------------------|--|
| 1. Publication Title<br><b>FOCUS</b>                                                                                                                                                                                                                                                                                                                                                                                                                                                                  |  | 2. Publication Number<br>2   1   5   7   1           |  | 3. Filing Date<br>09/28/2023                              |  |
| 4. Issue Frequency<br>Quarterly                                                                                                                                                                                                                                                                                                                                                                                                                                                                       |  | 5. Number of Issues Published Annually<br>4          |  | 6. Annual Subscription Price<br>\$695.00                  |  |
| 7. Complete Mailing Address of Known Office of Publication (Not printer) (Street, city, county, state, and ZIP+4)<br>Address 1: 800 Maine Ave SW<br>Address 2: Suite 900<br>City, State ZIP: Washington DC 20024-2812                                                                                                                                                                                                                                                                                 |  |                                                      |  | Contact Person<br>Brian Cole<br>Telephone<br>202-459-9750 |  |
| 8. Complete Mailing Address of Headquarters or General Business Office of Publisher (Not Printer)<br>Address 1: 800 Maine Ave SW<br>Address 2: Suite 900<br>City, State ZIP: Washington DC 20024-2812                                                                                                                                                                                                                                                                                                 |  |                                                      |  |                                                           |  |
| 9. Full Names and Complete Mailing Addresses of Publisher, Editor and Managing Editor (do not leave blank)                                                                                                                                                                                                                                                                                                                                                                                            |  |                                                      |  |                                                           |  |
| Publisher (Name and complete mailing address)<br>Name: Simone Taylor<br>Address 1: 800 Maine Ave SW<br>Address 2: Suite 900<br>City, State ZIP: Washington DC 20024-2812                                                                                                                                                                                                                                                                                                                              |  |                                                      |  |                                                           |  |
| Editor (Name and complete mailing address)<br>Name: Mark Rapaport<br>Address 1: 800 Maine Ave SW<br>Address 2: Suite 900<br>City, State ZIP: Washington DC 20024-2812                                                                                                                                                                                                                                                                                                                                 |  |                                                      |  |                                                           |  |
| Managing Editor (Name and complete mailing address)<br>Name: Peyton Fulz<br>Address 1: 800 Maine Ave SW<br>Address 2: Suite 900<br>City, State ZIP: Washington DC 20024-2812                                                                                                                                                                                                                                                                                                                          |  |                                                      |  |                                                           |  |
| 10. Owner (Do not leave blank. If the publication is owned by a corporation, give the name and address of all stockholders owning or holding 1 Percent or more of the total amount of stock. If not owned by a corporation, give the name and address of all individual owners. If owned by a partnership or other unincorporated firm, give its name and address as well as those of each individual owner. If the publication is published by a nonprofit organization, give its name and address.) |  |                                                      |  |                                                           |  |
| Full Name                                                                                                                                                                                                                                                                                                                                                                                                                                                                                             |  | Complete Mailing Address                             |  |                                                           |  |
| American Psychiatric Association                                                                                                                                                                                                                                                                                                                                                                                                                                                                      |  | 800 Maine Ave, SW, Ste 900, Washington DC 20024-2812 |  |                                                           |  |
| 11. Known Bondholders, Mortgagees and Other Security Holders Owning or Holding 1 Percent or more of Total Amount of Bonds, Mortgages, or Other Securities. If none, check box <input checked="" type="checkbox"/> None                                                                                                                                                                                                                                                                                |  |                                                      |  |                                                           |  |
| Full Name                                                                                                                                                                                                                                                                                                                                                                                                                                                                                             |  | Complete Mailing Address                             |  |                                                           |  |
| 12. Tax Status (For completion by nonprofit organizations authorized to mail at nonprofit rates) (Check one)<br>The purpose, function, and nonprofit status of this organization and the exempt status for federal income tax purposes:<br><input checked="" type="checkbox"/> Has Not Changed During Preceding 12 Months<br><input type="checkbox"/> Has Changed During Preceding 12 Months (Publisher must submit explanation of change with this statement below)                                  |  |                                                      |  |                                                           |  |

PS Form 3526, July 2014

|                                                                                                                                                                                                                                                                                                                                                       |  |                                                          |                                                             |
|-------------------------------------------------------------------------------------------------------------------------------------------------------------------------------------------------------------------------------------------------------------------------------------------------------------------------------------------------------|--|----------------------------------------------------------|-------------------------------------------------------------|
| 13. Publication Title<br><b>FOCUS</b>                                                                                                                                                                                                                                                                                                                 |  | 14. Issue Date for Circulation Data Below<br>07/15/2023  |                                                             |
| 15. Extent and Nature of Circulation                                                                                                                                                                                                                                                                                                                  |  | Average No. Copies Each Issue During Preceding 12 Months | No. Copies of Single Issue Published Nearest to Filing Date |
| a. Total Number of Copies (Net press run)                                                                                                                                                                                                                                                                                                             |  | 1,409                                                    | 1,328                                                       |
| b. Paid and/or Requested Circulation                                                                                                                                                                                                                                                                                                                  |  |                                                          |                                                             |
| (1) Mailed Outside-County Paid Subscriptions Stated on PS Form 3541 (include paid distribution above nominal rate, advertiser's proof copies, and exchange copies)                                                                                                                                                                                    |  | 900                                                      | 968                                                         |
| (2) Mailed In-County Paid Subscriptions Stated on PS Form 3541 (include paid distribution above nominal rate, advertiser's proof copies, and exchange copies)                                                                                                                                                                                         |  | 0                                                        | 0                                                           |
| (3) Paid Distribution Outside the Mails Including Sales Through Dealers and Carriers, Street Vendors, Counter Sales, and Other Paid Distribution Outside USPS                                                                                                                                                                                         |  | 0                                                        | 0                                                           |
| (4) Paid Distribution by Other Classes of Mail Through the USPS (e.g. First-Class Mail)                                                                                                                                                                                                                                                               |  | 0                                                        | 0                                                           |
| c. Total Paid Distribution (Sum of 15b (1), (2), (3), and (4))                                                                                                                                                                                                                                                                                        |  | 900                                                      | 968                                                         |
| d. Free or Nominal Rate Distribution (By Mail and Outside the Mail)                                                                                                                                                                                                                                                                                   |  |                                                          |                                                             |
| (1) Free or Nominal Rate Outside-County Copies Included on PS Form 3541                                                                                                                                                                                                                                                                               |  | 50                                                       | 50                                                          |
| (2) Free or Nominal In-County Copies Included on PS Form 3541                                                                                                                                                                                                                                                                                         |  | 0                                                        | 0                                                           |
| (3) Free or Nominal Rate Copies Mailed at Other Classes Through the USPS (e.g. First-Class Mail)                                                                                                                                                                                                                                                      |  | 0                                                        | 0                                                           |
| (4) Free or Nominal Rate Distribution Outside the Mail (Carriers or other means)                                                                                                                                                                                                                                                                      |  | 50                                                       | 50                                                          |
| e. Total Free or Nominal Rate Distribution (Sum of 15d (1), (2), (3) and (4))                                                                                                                                                                                                                                                                         |  | 100                                                      | 100                                                         |
| f. Total Distribution (Sum of 15c and 15e.)                                                                                                                                                                                                                                                                                                           |  | 1,000                                                    | 1,068                                                       |
| g. Copies not Distributed (See Instructions to Publishers #4 (page #3))                                                                                                                                                                                                                                                                               |  | 0                                                        | 0                                                           |
| h. Total (Sum of 15f and g.)                                                                                                                                                                                                                                                                                                                          |  | 1,000                                                    | 1,068                                                       |
| i. Percent Paid                                                                                                                                                                                                                                                                                                                                       |  | 90.00%                                                   | 90.64%                                                      |
| j. (15c Divided by 15f Times 100)                                                                                                                                                                                                                                                                                                                     |  |                                                          |                                                             |
| * If you are claiming electronic copies, go to line 16 on page 2. If you are not claiming electronic copies, skip to line 17 on page 3.                                                                                                                                                                                                               |  |                                                          |                                                             |
| 16. Electronic copy Circulation                                                                                                                                                                                                                                                                                                                       |  |                                                          |                                                             |
| If present, check box                                                                                                                                                                                                                                                                                                                                 |  |                                                          |                                                             |
| a. Paid Electronic Copies                                                                                                                                                                                                                                                                                                                             |  | 0                                                        | 0                                                           |
| b. Total Paid Print Copies (Line 15c) + Paid Electronic Copies (Line 16a)                                                                                                                                                                                                                                                                             |  | 900                                                      | 968                                                         |
| c. Total Print Distribution (Line 15f) + Paid Electronic Copies (Line 16a)                                                                                                                                                                                                                                                                            |  | 1,000                                                    | 1,068                                                       |
| d. Percentage Paid (Both Print & Electronic Copies (16b divided by 16c x 100)                                                                                                                                                                                                                                                                         |  | 90.00%                                                   | 90.64%                                                      |
| I certify that 50% of all my distribution copies (electronic and Print) are paid above a nominal price                                                                                                                                                                                                                                                |  |                                                          |                                                             |
| 17. Publication of Statement of Ownership                                                                                                                                                                                                                                                                                                             |  |                                                          |                                                             |
| <input checked="" type="checkbox"/> Publication required. Will be printed in the <u>10/15/2023</u> issue of this publication. <input type="checkbox"/> Publication not required                                                                                                                                                                       |  |                                                          |                                                             |
| 18. Signature and Title of Editor, Publisher, Business Manager, or Owner                                                                                                                                                                                                                                                                              |  | Title                                                    | Date                                                        |
| Brian Cole                                                                                                                                                                                                                                                                                                                                            |  | Senior Publishing Systems Manager                        | 09/28/2023                                                  |
| I certify that all information furnished on this form is true and complete. I understand that anyone who furnishes false or misleading information on this form or who omits material or information requested on the form may be subject to criminal sanctions (including fines and imprisonment) and/or civil sanctions (including civil penalties) |  |                                                          |                                                             |

PS Form 3526, July 2014

AMERICAN  
PSYCHIATRIC  
ASSOCIATION  
PUBLISHING

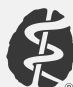

ORDER @ [www.appi.org](http://www.appi.org)  
Email: [appi@psych.org](mailto:appi@psych.org)  
Toll Free: 1-800-368-5777

20% Discount for American Psychiatric  
Association Members  
25% Discount for APA Resident-Fellow Members

# PSYCHIATRYonline

Your Destination for Lifelong Learning in Psychiatry

The one-stop resource for information on diagnosis, treatment, guidelines, the latest research, and breaking news from the field.

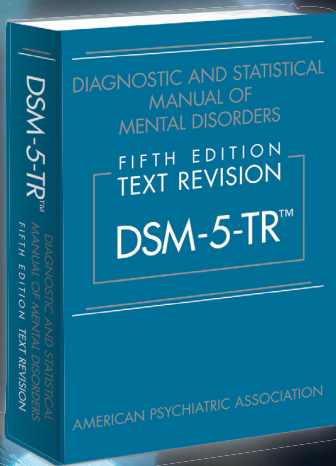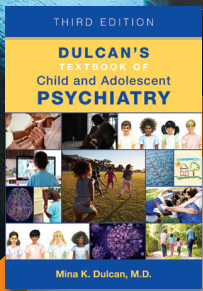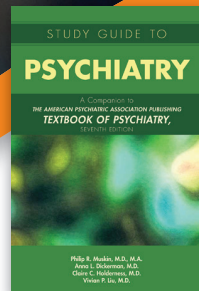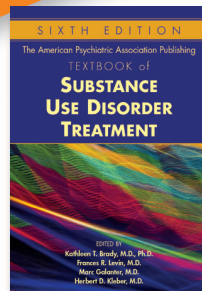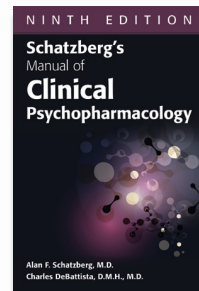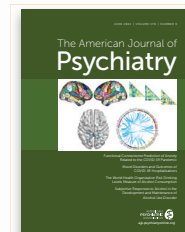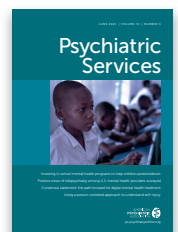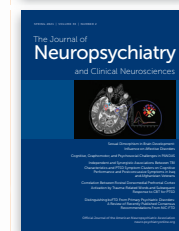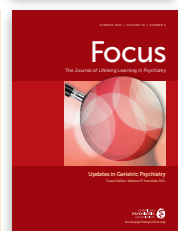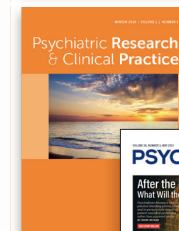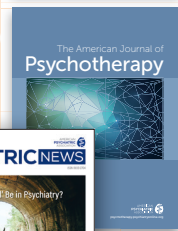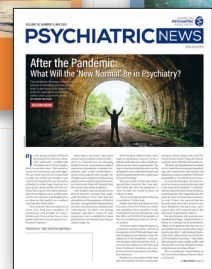

**PsychiatryOnline.org** is the platform for all American Psychiatric Association Publishing journals, *DSM-5-TR™*, and bestselling textbooks, as well as APA Practice Guidelines, and continuing medical education.

This is a one-stop resource for information on psychiatric diagnosis, treatment, guidelines, the latest research, and breaking news from the field. From a single location, users can search across all books and journals to find the most relevant content easier than ever.

Subscribe to products individually or to the DSM Select package that includes the DSM-5® library, books and select journals.

**Go to [www.appi.org](http://www.appi.org) to subscribe.**

*Institutional subscription options are available.*

*For more information contact: [institutions@psych.org](mailto:institutions@psych.org);  
800-368-5777 ext. 3729*

AMERICAN  
PSYCHIATRIC  
ASSOCIATION  
PUBLISHING  
  
[psychiatryonline.org](http://psychiatryonline.org)
