# ▶ PODCASTS from APA Publishing

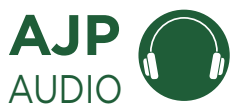

## AJP Audio

Host: Aaron Van Dorn, Online Content Manager

Each episode features an in-depth interview with an author from the most discussed article appearing in the latest issue of *The American Journal of Psychiatry*, along with Editor-in-Chief Ned Kalin highlighting the rest of the issue.

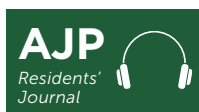

## The American Journal of Psychiatry Residents' Journal

Created by trainees for trainees and featuring interviews covering a wide array of topics including career exploration, personal/professional journeys, clinical practice tips, and more.

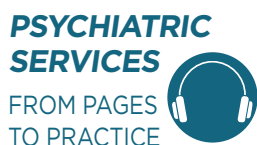

## Psychiatric Services From Pages to Practice

Hosts: Lisa Dixon, M.D., M.P.H., Editor, *Psychiatric Services*, and Josh Berezin, M.D., M.S.

Learn about the latest mental health services research published in *Psychiatric Services* and why it is relevant. Topics include community-based treatment programs, collaborative care, evidence-based treatment and service delivery, criminal and social justice, policy analysis, and more.

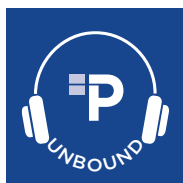

## Psychiatry Unbound

Host: Laura Roberts, M.D., M.A., Editor-in-Chief, APA Publishing Books

APA Publishing's Books podcast offers the opportunity to hear the voices behind the most prominent psychiatric scholarship in the field today. Learn about important topics in the field of psychiatry and see how our authors are making an impact in clinical settings throughout the world.

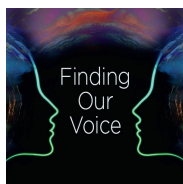

## Finding Our Voice

Host: Sanya Virani, MBBS, MPH

Finding Our Voice brings the viewpoints and opinions of the next generation of psychiatrists—including residents, fellows, and early career psychiatrists—to the forefront. Topics covered include systemic racism and social determinants.

Subscribe Today!

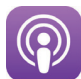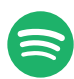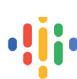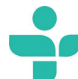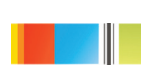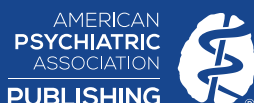

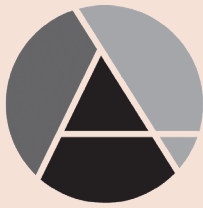

JOINTLY ACCREDITED PROVIDER  
INTERPROFESSIONAL CONTINUING EDUCATION

#### EDUCATIONAL OBJECTIVES

*Focus*, the APA clinical review and continuing medical education (CME) journal, is designed as a personal study resource to help practicing psychiatrists keep abreast of significant advances in the field, with particular attention to clinical practice.

With each issue, participants review current knowledge, recognize gaps in learning, and increase their understanding of an important topic in the field of psychiatry.

Participants also can prepare for an annual self-assessment designed to aid the physician in addressing areas where more study is needed to enhance management of patients.

#### TO EARN CME CREDIT

Each issue, prepared by distinguished faculty who are recognized leaders in their fields, incorporates a CME component. To earn CME credit for *Focus*, subscribers should read through the material presented in each issue. After reading the material, complete the CME Quiz and course evaluation online and earn credit with a passing score of 60%.

#### ACCREDITATION AND DESIGNATION

In support of improving patient care, the American Psychiatric Association is jointly accredited by the Accreditation Council for Continuing Medical Education (ACCME), the Accreditation Council for Pharmacy Education (ACPE), and the American Nurses Credentialing Center (ANCC), to provide continuing education for the healthcare team.

The APA designates this enduring activity for a maximum of 5 *AMA PRA Category 1 Credits*<sup>™</sup>. Physicians should claim only the credit commensurate with the extent of their participation in the activity.

Neither the American Psychiatric Association nor American Psychiatric Association Publishing holds itself responsible for statements made in its publications by contributors. Unless so stated, material in *Focus* does not reflect the endorsement, official attitude, or position of the American Psychiatric Association, American Psychiatric Association Publishing, or the journal's Editorial Board.

Material published in the journals of the American Psychiatric Association is protected by copyright and all rights are reserved. Material may not be reproduced in any form or by any means without written permission from the copyright owner. For permission to reproduce material from American Psychiatric Association journals, please visit [www.appi.org/CustomerService/Pages/Permissions.aspx](http://www.appi.org/CustomerService/Pages/Permissions.aspx) for more information. Permission can also be secured through the Copyright Clearance Center ([www.copyright.com](http://www.copyright.com)). For bulk reprints, please contact [permissions@psych.org](mailto:permissions@psych.org).

This consent does not extend to other kinds of copying, such as copying for general distribution, for advertising or promotional purposes, for creating new collective works, or for resale. Permission need not be obtained for photocopying isolated articles for nonprofit classroom or library reserve use; all fees associated with such permission are waived.

# Focus

The Journal of Lifelong Learning in Psychiatry

"Lifelong Learning in Psychiatry" is an evolving series of educational initiatives developed by the American Psychiatric Association to meet the changing needs of psychiatrists for the 21st century.

*Focus* offers clinical reviews and original research for practicing psychiatrists to keep abreast of significant advances in the field. Developed as part of APA's "Lifelong Learning in Psychiatry" series—educational initiatives to meet the changing needs of psychiatrists for the 21st century—*Focus* has as its goal the dissemination of up-to-date information while facilitating lifelong study skills and critical self-assessment for improving patient care and preparation for maintenance of certification. Each issue is designed as a personal study resource with particular attention to clinical practice and offers opportunities to earn *AMA PRA Category 1 Credit*<sup>™</sup>.

#### The American Board of Psychiatry and Neurology

The American Board of Psychiatry and Neurology has reviewed *Focus: The Journal of Lifelong Learning in Psychiatry* and the *Focus Self-Assessment Examination* and has approved this program as part of a comprehensive lifelong learning and self-assessment program, which is mandated by the American Board of Medical Specialties as a necessary component of maintenance of certification.

#### Royal College of Physicians and Surgeons of Canada

The *Focus Self-Assessment* is an Accredited Self-Assessment Program (Section 3) as defined by the Maintenance of Certification Program of the Royal College of Physicians and Surgeons of Canada, and was approved by the Canadian Psychiatric Association. You may claim a maximum of 24 hours (credits are automatically calculated).

The specific opinions and content of this event are not necessarily those of the CPA, and are the responsibility of the organizer(s) alone.

**Editor and Advisor Program Planner Disclosure Listing for *Focus* Editor in Chief:**

Mark H. Rapaport, M.D., has no relevant financial relationships to disclose.

**Editor and Advisor Program Planner Disclosure Listing for *Focus* and *Focus* Self-Assessment Editors, Associate Editors, Editorial Boards, and staff:**

Ian Cook, M.D., active biomedical device patents assigned to the University of California; CEO and director of HeartCloud Inc. and BrainCloud Corporation; CEO and board chair of NeuroSigma Inc. (on leave since 2016 as chief medical officer); equity interest in HeartCloud Inc. and the BrainCloud Corporation; stock options in NeuroSigma Inc. Boadie Dunlop, M.D., grant/research funding from Compass Pathways, Otsuka, Aptinyx, Acadia; consultant at Myriad Neuroscience, Sage Therapeutics, Otsuka Pharmaceutical, Greenwich Biosciences. James L. Knoll IV, M.D., annual honorarium as a member of the teaching faculty for the annual AAPL forensic psychiatry board review course. Raymond Lam, M.D., consultant: Allergan, Asia-Pacific Economic Cooperation, Canadian Network for Mood and Anxiety Treatments, Janssen, Lundbeck, Myriad Neuroscience, Otsuka, Pfizer; ad hoc speaking honoraria: Canadian Network for Mood and Anxiety Treatments, Canadian Psychiatric Association, Hansoh, Lundbeck, Lundbeck Institute, Pfizer; grant/research funding from BC Leading Edge Endowment Fund, Canadian Institutes of Health Research, Canadian Network for Mood and Anxiety Treatments, Healthy Minds Canada, Janssen, Lundbeck, Michael Smith Foundation for Health Research, MITACS, Ontario Brain Institute, St. Jude Medical, University Health Network Foundation, VGH-UBCH Foundation; book royalties: Cambridge University Press, Informa Press, Oxford University Press; copyright: Lam Employment Absence and Productivity Scale (LEAPS). Vishal Madaan, M.D., grant/research funding from Allergan, Boehringer-Ingelheim, Neurocrine, Otsuka, Pfizer, Shire, Supernus. David Mischoulon, M.D., Ph.D., employed part time, MGH Clinical Trials Network and Institute (CTNI), which has received research funding from multiple pharmaceutical companies and NIMH; grant/research funding from Nordic Naturals (donated omega-3 fatty acid medication and placebo for clinical trial) and heckel medizintechnik GmbH (supplied whole body hyperthermia device for clinical trial). Francisco A. Moreno, M.D., Liva Nova: DSMB chair. Jeffrey J. Rakofsky, M.D., grant/research funding from Compass, Otsuka. Sidney Zisook, M.D., grant/research funding from COMPASS Pathways.

**Editors and Members of the Editorial Boards of *Focus* and the *Focus* Self-Assessment and staff listed below report no disclosures:**

Jacob M. Appel, M.D., J.D., Richard Balon, M.D., Carol A. Bernstein, M.D., Kathleen T. Brady, M.D., Peter F. Buckley, M.D., Ph.D., Paul J. Carlson, M.D., Josepha A. Cheong, M.D., Peyton Fultz, Glen O. Gabbard, M.D., Asmara T. Hoo-Cardiel, D.O., Paresh Atu Jaini, D.O., Venkata Kolli, M.B.B.S., Sherrell T. Lam, M.D., Ira M. Lesser, M.D., John Luo, M.D., Avram H. Mack, M.D., Philip R. Muskin, M.D., Michele T. Pato, M.D., M.P.H., Lorena Reyna, M.D., Victor I. Reus, M.D., Dorothy E. Stubbe, M.D., Yi-lang Tang, M.D., Ph.D., John Teshima, M.D., M.Ed., James W. Thompson, M.D., M.P.H., Marcia L. Verduin, M.D., Joel Yager, M.D.

**Improvement in Medical Practice/Performance in Practice (PIP) Clinical Modules Published in *Focus***

Contact American Psychiatric Association, Department of CME, [educme@psych.org](mailto:educme@psych.org) for information regarding revised end dates and updates to the MOC Part 4 PIP clinical modules. Performance in Practice modules are available to all *Focus* subscribers online in the APA Learning Center at [education.psychiatry.org](http://education.psychiatry.org).

The American Board of Psychiatry and Neurology has approved the following *Focus* Performance in Practice clinical chart review tools of the American Psychiatric Association as Maintenance of Certification, Part 4, Clinical Modules.

Performance in Practice: Practice Assessment  
Tool for the Care of Patients with Schizophrenia  
October 2020–October 2023

Performance in Practice: Clinical Module for the Care  
of Patients with Posttraumatic Stress Disorder  
September 2018–September 2023

Performance in Practice: Clinical Module for  
Screening Adult Psychiatric Patients for Substance  
Use Disorders  
September 2018–September 2024

**PIP Clinical Modules online (MOC Part 4)**

FOCUS subscribers who are also APA members: Access and complete PIP Clinical Modules online in the APA Learning Center at [education.psychiatry.org](http://education.psychiatry.org) using your APA member login.

Non-member subscribers: Contact [educme@psych.org](mailto:educme@psych.org) for access to PIP Clinical Modules online at [education.psychiatry.org](http://education.psychiatry.org).

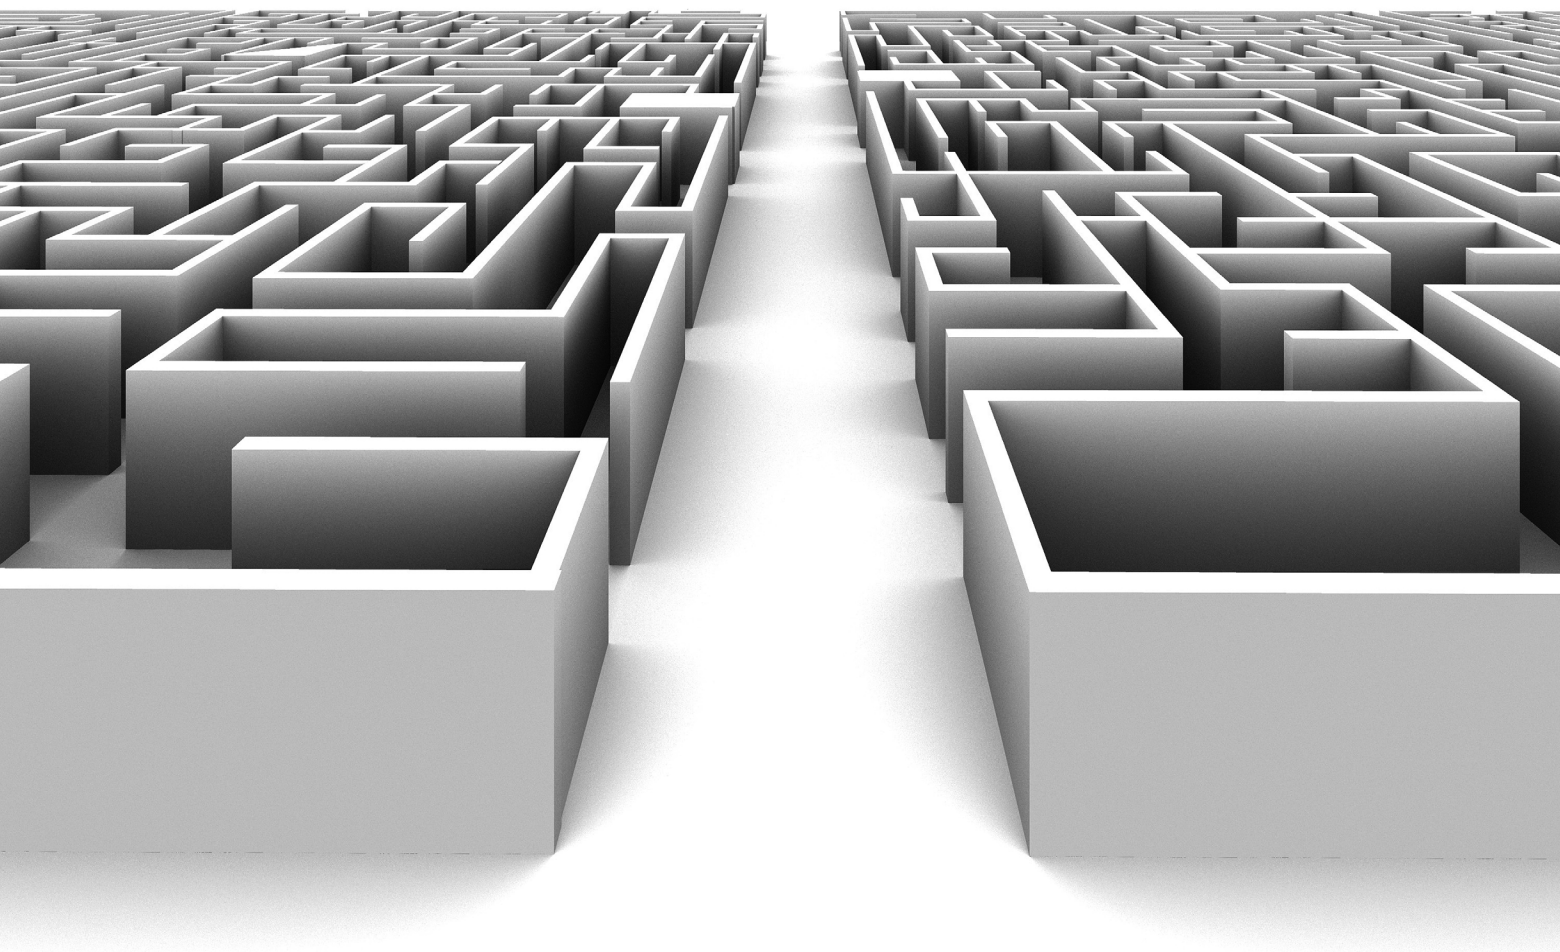

Due to a number of factors, accurate and timely identification of bipolar disorder often remains elusive, with many individuals not receiving an accurate diagnosis for several years after onset of symptoms. This issue of *Focus* examines the assessment and treatment of this complex psychiatric condition. (Photo: glamstock/Imazins, via Getty Images)
