FALL 2023 | VOLUME 21 | NUMBER 4

# Focus

The Journal of Lifelong Learning in Psychiatry

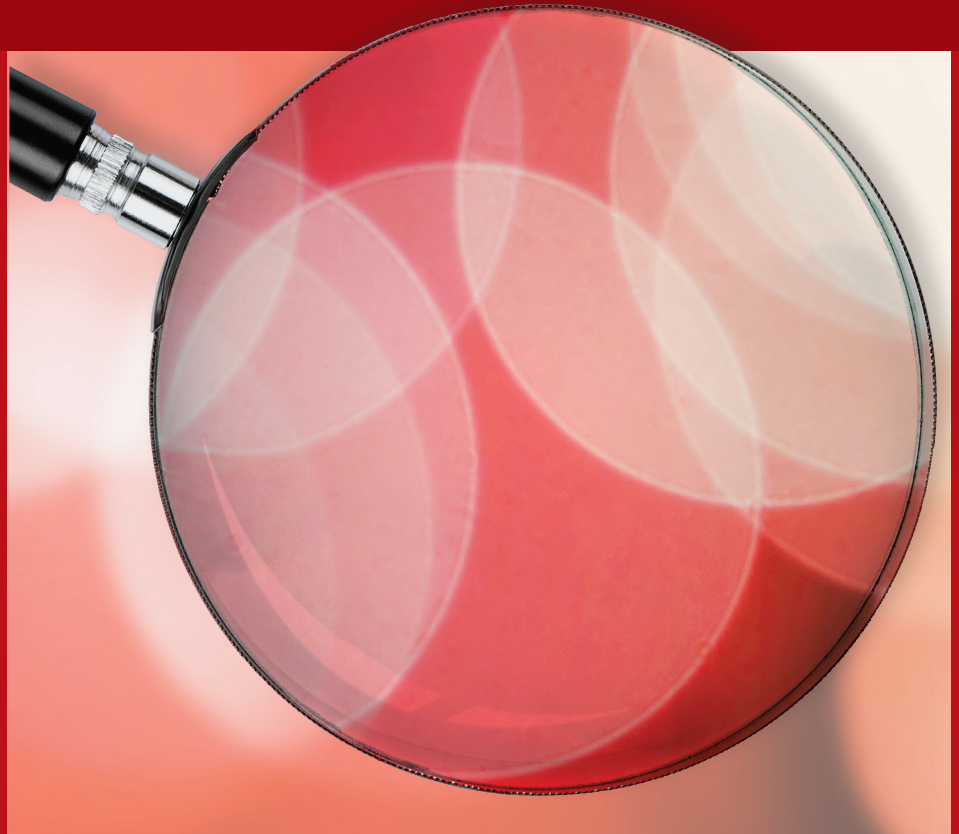

## Assessment and Management of Bipolar Disorder

Guest Editor: Trisha Suppes, M.D., Ph.D.

AMERICAN  
PSYCHIATRIC  
ASSOCIATION 

[focus.psychiatryonline.org](http://focus.psychiatryonline.org)
